# Supplementary material
Source: Springer Nature journal article supplement (https://www.springermedizin.de/resource/supplementary/12885_2008_1279_MOESM1_ESM.pdf/9471626)

**Deaths/  
100,000 Age  
standardized**

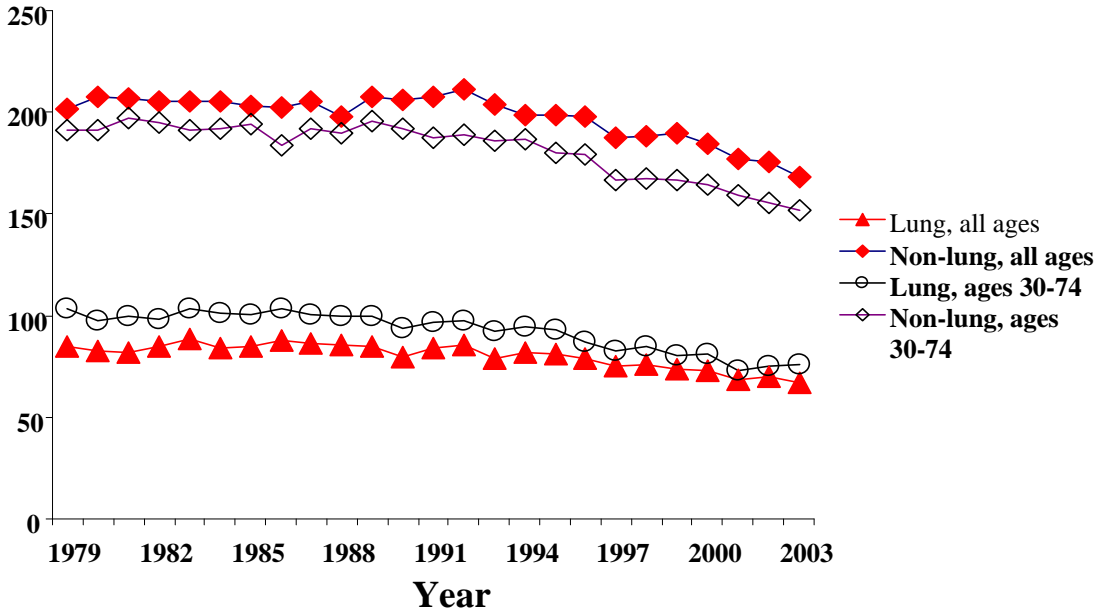

Supplement: MOESM1 [file 9471626]
